# Supplementary material for: Natural Variation in Arabidopsis Cvi-0 Accession Reveals an Important Role of MPK12 in Guard Cell CO2 Signaling
Source: PLoS Biol. 2016 Dec 6;14(12):e2000322. doi: 10.1371/journal.pbio.2000322 (PMC5147794; doi:10.1371/journal.pbio.2000322)
Supplement: S1 Data — (XLSX) [file pbio.2000322.s011.xlsx]

## Sheet: Fig 1B
	Line	Stomatal conductance (mmol m-2 s-1)
	Col-S	242.176
	Col-S	306.058
	Col-S	259.367
	Col-S	216.329
	Col-S	222.073
	Col-S	210.694
	Col-S	248.34
	Col-S2	305.187
	Col-S2	280.52
	Col-S2	314.269
	Col-S2	289.387
	Col-S2	260.393
	Col-S2	303.66
	Col-S2	425.017
	Col-S2	318.657
	Col-S2	397.152
	Col-S2	344.597
	Col-S2	314.152
	Col-S2	335.809
	Col-S3	109.228
	Col-S3	70.0108
	Col-S3	143.696
	Col-S3	126.172
	Col-S3	177.143
	Col-S3	120.432
	Col-S3	144.911
	WT Col-0	98.24
	WT Col-0	121.337
	WT Col-0	90.4338
	WT Col-0	120.864
	WT Col-0	123.847
	WT Col-0	144.837
	WT Col-0	159.753
	WT Cvi-0	330.357
	WT Cvi-0	328.138
	WT Cvi-0	437.254
	WT Cvi-0	425.813
	WT Cvi-0	368.021
	WT Cvi-0	311.963
	WT Cvi-0	289.673

## Sheet: Fig 1C
		Stomatal conductance (mmol m-2 s-1)
	Time	WT Col-0	WT Col-0	WT Col-0	WT Col-0	WT Col-0	WT Col-0	WT Col-0	WT Col-0	WT Col-0	cas-1	cas-1	cas-1	cas-1	cas-1	cas-1	cas-1	cas-1	cas-1	cas-1	cas-2	cas-2	cas-2	cas-2cis	cas-2cis	cas-2cis	cas-2cis	cas-2cis	cas-2cis	cas-2cis	cas-2cis	cas-2cis	cas-3	cas-3	cas-3	cas-3	cas-3	cas-3	cas-3	cas-3	cas-3	cis	cis	cis	cis	cis	cis	cis	cis
	-30	174.85	132.768	152.206	143.901	118.635	95.41	115.992	95.4572	165.267	151.602	144.562	120.028	189.444	134.635	158.224	212.009	153.083	137.565	155.773	140.109	163.397	153.198	224.897	272.974	256.103	270.514	251.383	310.985	373.745	405.778	262.39	139.965	121.785	153.286	154.862	185.21	143.924	131.489	103.235	158.553	296.303	287.244	267.035	186.954	279.29	273.096	322.11	270.338
	-22	191.244	151.568	111.51	127.97	130.771	112.122	100.992	92.8045	167.712	148.579	183.076	109.155	181.509	147.371	178.042	190.447	118.417	129.646	165.668	138.617	158.545	166.643	251.628	273.825	263.026	315.86	215.052	338.466	432.714	385.955	293.538	167.97	116.315	165.535	169.949	202.467	142.127	135.984	119.213	173.031	275.082	288.566	311.367	226.037	291.492	276.502	328.868	301.545
	-14	177.305	156.613	144.73	146.109	120.056	97.1262	122.21	92.7329	166.974	164.54	161.506	92.9974	186.457	119.091	190.329	191.468	154.905	122.754	147.878	126.2	167.488	151.932	250.141	277.523	269.765	311.455	235.996	292.762	439.866	424.68	269.108	127.882	108.19	200.616	141.861	181.295	139.536	135.283	110.339	150.022	331.809	270.376	278.408	202.368	305.974	252.359	311.476	279.953
	-6	179.796	153.371	138.684	129.076	127.72	94.0366	121.26	97.1238	152.096	144.451	155.109	138.313	178.84	133.561	186.786	205.53	120.609	128.593	141.427	136.5	162.65	162.454	285.444	257.869	266.713	251.396	234.445	377.833	394.339	413.784	273.099	171.711	112.737	187.46	174.083	199.294	128.405	146.46	124.05	168.394	312.776	313.683	285.396	207.81	294.714	330.786	322.691	277.099
	2	177.598	135.388	154.624	143.928	137.496	118.089	112.503	109.829	164.563	153.296	154.888	116.354	184.414	132.344	199.866	209.921	137.417	151.754	163.895	118.655	170.685	175.584	264.65	277.593	278.927	291.771	230.031	323.928	468.123	349.556	290.071	145.663	112.831	185.449	162.023	183.988	138.947	141.235	89.255	183.793	276.684	266.577	313.857	230.215	306.37	277.823	325.313	329.849
	10	150.54	145.136	82.6048	109.273	93.7078	60.2786	88.7609	61.668	115.509	93.1144	136.652	69.613	134.304	106.49	128.234	158.662	89.3106	91.7	117.936	104.043	124.647	128.126	255.435	274.639	228.397	267.378	223.819	329.959	412.886	398.422	254.107	135.741	72.1541	136.102	110.262	117.386	76.0433	103.177	91.5786	131.219	308.425	283.204	258.651	164.109	282.596	235.154	276.779	320.802
	18	124.777	115.831	93.9016	100.08	98.4873	59.3728	69.1323	70.6782	108.131	88.9742	93.8404	63.3014	130.655	94.789	143.486	150.739	76.363	74.1068	94.7738	83.4185	113.013	104.145	218.715	282.187	249.872	207.023	204.592	274.228	383.4	427.678	227.599	85.3147	61.9073	137.109	94.5306	108.841	73.5644	93.9058	62.9696	109.571	300.017	289.569	288.598	176.223	287.968	262.495	284.672	283.686
	26	114.502	132.364	73.4471	86.7309	82.3428	63.1043	70.6561	71.5834	116.653	67.2372	104.497	79.4581	128.76	88.1324	111.223	139.521	60.6959	77.1877	112.227	87.1606	110.021	118.315	229.432	262.1	262.111	204.007	209.031	236.853	377.337	373.046	253.352	119.827	63.1387	111.756	86.0007	89.1257	77.324	105.33	76.2628	126.347	264.231	261.038	258.486	155.392	271.662	281.139	229.913	293.453
	34	125.646	108.634	75.308	96.9595	86.0902	51.3679	86.0836	55.1896	106.94	89.2522	119.007	77.4202	130.047	91.0228	135.908	142.114	59.871	60.1441	107.437	78.7155	101.074	116.388	188.549	261.021	263.315	193.704	183.362	243.748	343.864	340.304	221.068	97.1353	75.638	118.557	83.8687	106.095	86.7805	103.239	70.1393	111.112	264.952	267.149	255.933	173.704	273.464	255.773	234.432	312.184
	42	122.617	132.562	61.6288	78.6971	79.3808	58.4136	75.8141	78.5384	106.792	81.305	95.7897	69.4149	119.76	85.2762	126.201	121.273	65.5077	68.1439	106.7	83.2042	102.126	110.936	218.629	291.874	236.594	164.982	184.838	220.868	333.148	325.009	180.511	112.203	56.9811	142.005	72.5481	85.0289	71.9272	124.715	74.7172	102.067	290.22	266.129	250.36	142.767	248.28	221.042	206.919	306.195
	50	128.895	102.337	72.8311	88.3131	77.3539	59.098	72.2092	81.8629	117.231	79.3094	96.6906	75.2149	129.417	76.542	128.232	144.066	55.0274	84.3089	98.9236	78.5595	90.3936	107.276	163.288	244.408	253.107	201.735	176.059	250.536	338.155	348.932	192.509	119.294	66.0346	132.105	81.4357	100.491	76.1451	124.555	63.8051	104.847	270.324	246.911	237.35	150.03	252.809	221.739	209.195	261.547
	58	115.742	127.441	63.8954	78.8311	63.4183	61.6043	77.4473	90.4748	108.113	57.3536	112.994	78.3253	122.507	88.3626	121.945	119.302	63.1611	53.3134	114.46	82.9713	101.438	106.769	192.046	243.074	241.927	162.733	165.941	174.411	323.787	308.768	170.832	123.455	81.4197	115.629	75.6002	88.4652	74.0067	106	74.5417	102.106	261.301	265.391	225.46	135.665	257.588	246.052	222.163	320.912
[truncated: 1 more columns]

## Sheet: Fig 1D
	Line	Stomatal half-response time (min)
	Col-0	5.40224
	Col-0	4.71326
	Col-0	5.59166
	Col-0	4.9331
	Col-0	5.08446
	Col-0	3.51614
	Col-0	3.83356
	Col-0	5.57206
	Col-0	4.74143
	Col-0	3.96966
	Col-0	4.37821
	Col-0	4.52012
	Col-0	3.89308
	Col-S2	21.4292
	Col-S2	20.7926
	Col-S2	22.9591
	Col-S2	21.3662
	Col-S2	21.0033
	Col-S2	17.8297
	Col-S2	21.3103
	Col-S2	21.1004
	Col-S2	24.6475
	Col-S2	39.5166
	Col-S2	23.3876
	Col-S2	17.4765
	Col-S2	23.835
	cis	18.8975
	cis	27.5188
	cis	25.2742
	cis	19.6316
	cis	20.649
	cis	20.0198
	cis	20.6647
	cis	21.8326
	cis	23.6561
	cis	18.9693
	cis	17.4683
	cis	24.8199
	cis	22.4822

## Sheet: Fig 2A
			Stomatal conductance (mmol m-2 s-1)
	Time (h:mm)	Light	WT Col-0	WT Col-0	WT Col-0	WT Col-0	WT Col-0	WT Col-0	WT Col-0	WT Col-0	WT Col-0	WT Col-0	WT Col-0	WT Col-0	WT Col-0	WT Col-0	Col-S2	Col-S2	Col-S2	Col-S2	Col-S2	Col-S2	Col-S2	Col-S2	Col-S2	Col-S2	Col-S2	Col-S2	Col-S2	Col-S2	Col-S2	Col-S2	mpk12-3	mpk12-3	mpk12-3	mpk12-3	mpk12-3	mpk12-3	mpk12-3	mpk12-3	mpk12-3	mpk12-3	mpk12-3	mpk12-3	mpk12-3	mpk12-3	mpk12-4	mpk12-4	mpk12-4
	1900-01-01 00:04:00	OFF	73.1286	45.8012	52.6723	30.3997	20.5136	26.3559	30.3816	36.7649	30.7618	52.0944	29.6649	23.0571	40.0949	31.7316	83.4171	103.758	66.2993	49.8857	81.4574	103.951	59.9055	88.8794	123.716	78.0998	53.5251	107.571	74.8505	70.3694	79.2431	75.7212	98.9501	81.563	115.661	77.5532	75.4042	70.7056	77.0193	81.6307	85.3008	48.4818	77.2069	50.4672	72.0588	65.2545	59.5553	78.4073	69.909
	1900-01-01 00:20:00	OFF	70.0919	46.83	55.8896	34.4998	25.4563	26.529	30.5029	37.0558	36.7527	50.2049	31.6605	32.8799	41.7822	30.7316	75.7293	91.1367	75.6586	37.0239	75.5555	97.1417	74.1567	81.7316	130.215	74.518	52.4074	108.773	69.4993	68.9168	77.2505	68.8136	95.0873	82.3108	116.241	76.2807	70.6366	68.8065	70.6195	80.3231	84.2935	48.5914	76.8119	41.6706	75.7621	67.4995	71.0575	79.6067	67.6671
	1900-01-01 00:36:00	OFF	74.5293	46.1466	59.2065	34.6075	17.1677	32.152	28.4104	34.2868	33.1802	49.0789	34.9925	32.0536	42.6247	33.1031	84.5669	102.639	74.7747	44.2488	74.2249	97.9125	68.2574	75.5781	122.059	75.376	39.0957	102.212	66.7243	86.8943	74.7499	70.7145	97.1515	79.245	112.627	71.8101	76.3254	62.6754	78.039	75.4177	78.8986	47.1339	76.3229	46.1107	71.9531	70.2938	69.8828	83.713	64.0569
	1900-01-01 00:52:00	OFF	75.3047	44.7882	53.0406	31.3519	24.6005	25.6496	29.2748	34.3313	35.6962	50.8906	29.4125	32.8685	42.0441	34.3534	72.9039	98.9868	76.7375	48.5445	70.9407	105.541	68.4105	80.445	124.064	74.0767	46.7264	104.895	67.9335	74.519	70.2957	68.6732	94.2743	82.8986	114.836	73.7885	76.5642	70.0487	75.4194	79.9948	89.2153	49.0574	72.5956	45.0806	76.5228	65.5982	74.7579	85.9656	64.4012
	1900-01-01 01:08:00	OFF	77.5641	48.0151	61.2896	36.0152	23.8356	26.7404	32.8171	34.2307	32.5081	50.4531	34.5273	32.8202	42.5718	31.7339	86.3546	100.484	69.4229	45.007	72.1102	103.901	68.856	79.6323	118.346	74.104	49.3883	98.7319	64.8038	76.2493	70.4404	65.2962	100.312	89.0004	113.272	71.0768	70.4583	66.7371	77.9926	80.8015	78.8278	45.5163	70.6496	50.6864	78.0708	66.2735	74.8122	81.18	64.7127
	1900-01-01 01:24:00	OFF	80.2331	49.0075	50.5093	33.1449	23.788	24.8811	32.4005	33.2621	30.9847	48.2743	32.0451	33.2377	44.4907	33.421	82.353	96.3125	68.2914	45.174	71.9203	97.0697	65.2358	74.5039	118.391	70.6215	48.1826	100.09	60.2117	75.7028	73.1402	66.9105	86.1266	86.6077	113.48	77.9052	70.502	72.8655	78.5515	76.5833	80.7474	45.9494	71.7128	39.3268	75.6155	57.9391	65.3707	76.9052	60.8143
	1900-01-01 01:40:00	OFF	76.8303	47.5313	59.3428	35.509	26.8533	25.3879	29.7709	30.8779	33.3029	51.4996	31.6554	31.9688	39.9153	28.4014	76.8995	91.8367	72.2917	45.4279	70.282	100.575	69.6834	74.5304	109.131	59.666	46.0044	103.447	63.0266	76.6982	72.9282	65.2218	102.076	79.991	106.542	69.0051	68.0487	67.772	81.7665	75.9613	81.6704	42.8243	72.3855	42.5289	71.9237	64.8656	71.3943	78.0856	59.0883
	1900-01-01 01:56:00	OFF	65.342	48.7116	59.4684	36.278	24.2706	28.0244	26.6884	36.7825	37.848	49.3583	32.4744	31.3144	41.2384	34.187	87.1987	89.7341	65.2157	42.9328	68.1549	98.3853	54.9666	72.7821	103.961	69.3217	33.1211	93.448	58.429	71.0801	72.85	61.8762	102.763	85.9708	99.5305	71.5319	65.7633	69.938	75.5989	72.214	81.4028	44.8276	70.6725	44.2762	77.8042	66.9946	61.2854	76.7095	57.0391
	1900-01-01 02:12:00	OFF	65.8385	48.4468	57.2899	34.2213	29.3821	30.5764	29.6326	37.512	34.6819	52.4019	29.797	31.4331	40.4896	33.3116	80.0099	89.7824	72.1897	40.3266	67.7151	98.779	64.4383	69.2027	106.44	69.1076	47.581	96.0753	58.5247	70.7228	70.6527	62.3535	99.2418	80.8468	95.5929	64.6165	69.7293	64.9869	70.3358	75.0454	78.346	41.9717	69.7614	39.1763	73.9085	64.7321	70.5302	75.9726	56.8702
	1900-01-01 02:28:00	OFF	66.5552	49.0594	58.215	33.7553	27.5534	28.3025	32.1723	33.4187	33.1094	51.8487	29.7959	31.9538	40.8329	32.4623	85.4433	90.3916	60.0776	46.0674	66.1106	96.9148	67.9663	68.6859	108.43	70.3204	40.1547	96.7257	58.7856	70.0345	73.0221	62.5433	99.6878	84.3298	93.8607	65.0219	65.072	66.7167	77.3029	75.3056	78.0921	46.2164	70.1936	39.762	78.939	65.3505	68.9986	73.5274	60.8361
	1900-01-01 02:44:00	OFF	70.7972	39.9825	59.0231	32.9193	26.7289	27.9026	29.5406	38.3851	28.2498	53.293	31.6211	32.7794	43.9832	31.2432	85.2778	92.2713	72.2882	42.806	65.4037	96.0472	58.6891	65.9143	103.006	68.2387	40.8237	93.8333	58.1355	65.0825	70.0295	55.2936	77.9109	78.8256	96.1525	64.0009	68.3552	69.8397	75.0643	75.0324	80.3761	42.9932	68.2486	40.8832	80.5675	71.4614	62.5661	77.1726	58.2304
	1900-01-01 03:00:00	OFF	70.3336	50.2035	55.1914	37.1714	25.1021	26.2437	31.6109	36.7488	34.5287	50.0608	34.4172	34.6736	42.5536	32.9576	84.0715	90.5455	60.1768	38.2449	64.8936	92.0166	65.0668	63.9861	117.908	68.8499	37.3922	93.7478	53.1445	67.494	67.9093	59.7821	91.0494	82.4241	97.2438	65.6306	66.7439	65.3417	81.3997	76.5304	76.1783	42.3374	59.8747	41.9021	79.5297	72.2166	74.7257	73.1447	54.835
	1900-01-01 03:16:00	OFF	73.1514	51.1915	65.8889	30.1483	33.8541	27.1363	28.0374	42.3475	35.9001	52.2877	34.0246	33.684	45.2556	34.2636	82.2555	89.0687	68.2488	42.0046	64.0603	101.238	64.5111	62.871	113.234	67.0903	33.4464	97.7698	56.6489	69.4139	72.6343	60.4565	91.7815	94.5878	101.735	62.5835	67.6218	65.2879	71.5468	73.7313	82.93	30.4197	69.2054	40.2954	80.9613	80.6529	52.8853	74.3249	58.8651
	1900-01-01 03:32:00	OFF	78.8509	49.77	63.8008	36.6689	27.364	29.5269	32.3543	42.706	35.1473	52.2049	30.9552	34.0539	47.075	35.3169	82.52	87.9407	64.7	41.5573	63.3843	97.4462	65.5496	61.1191	122.58	67.7821	38.2095	91.9037	51.1742	60.8306	72.6354	60.5809	101.686	88.3904	105.618	73.2084	66.7161	65.1492	67.3007	74.8101	76.8116	41.774	69.8714	46.0611	82.0047	74.4843	71.4854	76.6921	56.0301
	1900-01-01 03:48:00	OFF	83.3265	50.8718	68.7161	35.5283	31.792	30.3754	33.8948	39.8968	38.0627	56.6322	35.1289	32.6421	47.0667	32.5085	85.5799	83.3741	65.7897	42.9622	63.2705	94.2002	62.3006	62.8044	116.902	66.2276	37.0837	88.3449	55.6575	65.9147	73.1912	57.7415	91.4165	91.5607	105.825	73.2331	67.5271	67.7257	78.8463	73.9776	79.8263	45.9981	67.8927	47.1291	81.7694	69.8662	73.8694	77.7448	58.8315
	1900-01-01 04:04:00	OFF	75.9982	49.1346	78.6026	36.315	28.5754	25.2778	31.868	43.4855	35.9225	56.4169	34.3552	34.5244	44.2293	30.8005	83.4792	89.8329	71.7509	41.01	62.6095	96.583	47.5743	62.7031	108.31	62.6395	38.6043	91.7325	53.7717	75.891	73.3869	55.1532	94.211	95.3404	101.755	59.715	70.1284	63.6555	73.9109	77.1503	77.2171	42.1198	66.8419	42.6409	80.6479	71.4046	65.5599	80.0627	56.37
	1900-01-01 04:20:00	OFF	70.7868	52.5251	74.5437	36.4895	31.2966	28.2189	33.5649	40.8191	34.385	52.8526	34.772	34.368	42.9654	34.2565	73.6342	85.9339	71.5299	42.0674	60.2434	97.2522	62.7946	60.1839	103.944	67.8314	37.2898	91.9135	53.044	66.1474	69.1386	53.1259	102.686	85.5254	98.1101	65.9754	67.7764	67.994	70.673	75.1634	81.1424	42.4201	72.6949	45.6225	85.9344	74.799	72.3136	78.4064	58.5483
	1900-01-01 04:36:00	OFF	70.165	55.6282	74.1174	37.7218	33.2607	30.1271	33.8847	42.8411	22.174	53.3814	36.4171	35.4694	41.599	36.0579	83.2546	87.6405	69.0895	43.4462	61.3822	92.9986	61.555	62.1251	106.55	69.0912	35.9147	88.6229	55.1726	76.5849	69.6435	57.6427	113.546	93.8361	94.4591	68.7525	71.6111	66.2022	75.6107	75.087	85.2838	45.4505	71.1093	42.9518	89.6572	62.7856	69.9574	78.9804	62.2375
	1900-01-01 04:52:00	OFF	70.9276	52.1594	72.5752	39.4133	32.1725	29.856	36.3523	41.9804	38.445	56.2739	36.4256	35.9624	45.3738	34.3382	81.4182	87.3239	62.7618	46.5066	59.7576	94.5766	63.3653	56.8548	111.136	68.9082	35.8578	92.5839	52.9912	65.541	68.0973	55.1447	102.955	88.3116	90.4524	67.597	69.7487	56.7582	60.4196	78.2074	77.6768	43.0642	66.5874	42.2716	89.4864	73.9426	73.3969	82.9251	59.1971
	1900-01-01 05:08:00	OFF	72.1725	53.3596	85.709	36.8284	28.0535	30.9633	22.4056	44.2986	38.4375	58.9627	39.7432	34.9197	45.3228	37.3568	85.561	85.6821	66.0038	42.8791	60.8389	95.6671	62.6028	59.4784	114.565	67.6204	37.5445	88.2711	64.4483	75.2034	73.0981	56.0697	112.842	103.468	92.1602	71.6998	71.8318	68.1734	78.0843	78.4483	85.5827	46.0287	72.7899	39.0959	91.8009	78.9325	72.6305	84.3924	62.5279
	1900-01-01 05:24:00	OFF	76.7122	53.2248	79.6898	37.2915	32.5342	32.4104	36.6309	44.9465	38.6104	59.2641	38.7507	35.0886	51.4295	35.543	86.6823	86.1505	68.6861	44.4155	58.2849	96.0869	53.8375	59.9654	120.65	67.1589	38.0576	91.4675	55.5536	64.427	71.8659	55.3255	102.184	100.282	100.001	75.7883	70.685	68.1174	80.3353	79.5806	86.0957	46.4305	73.4944	43.9154	93.0615	82.4542	70.4102	86.9178	56.4438
	1900-01-01 05:40:00	OFF	78.8724	49.326	76.4249	36.4887	36.5512	30.0297	38.1837	49.743	37.3599	63.3128	41.3603	36.5341	50.2617	39.6874	79.7199	86.573	72.5948	41.8991	61.0583	101.646	63.6155	58.41	122.711	63.8147	39.8828	98.3555	55.5604	57.9625	48.1399	55.7854	123.961	94.234	110.533	76.7441	75.0732	69.3493	69.6792	79.5606	87.2102	43.7812	70.9024	47.9015	95.2058	72.2763	76.2207	87.776	57.6817
	1900-01-01 05:56:00	OFF	80.2345	53.7668	82.9372	38.1272	34.3935	31.1161	39.2934	45.4862	38.8786	64.0985	39.1162	34.5333	46.7832	36.6985	82.2031	85.65	73.1683	48.2278	60.3664	100.039	65.1909	60.9171	110.631	68.2282	36.2026	94.3831	56.2088	81.4357	70.9192	56.3978	119.245	108.16	101.456	75.0929	75.857	72.4041	84.6737	80.8061	89.7239	47.7966	74.14	51.0725	97.8981	76.9996	78.9335	86.3923	59.3293
	1900-01-01 06:12:00	OFF	76.714	57.1635	81.2233	43.8479	37.1308	34.6508	38.4664	41.5759	35.4808	64.3638	39.5018	34.3023	46	39.4955	89.7292	87.0494	71.8372	47.5151	59.3544	94.477	68.2114	59.1666	113.825	69.8969	41.7418	95.5336	55.0177	58.2606	72.2911	54.6411	117.766	119.39	89.4403	70.1353	80.1083	75.2631	73.8929	82.957	92.6314	45.2785	74.9452	52.1397	97.3035	79.5793	83.8853	92.5179	65.0418
	1900-01-01 06:28:00	OFF	70.3275	57.9218	76.0659	37.8303	33.1477	33.1265	36.9394	48.0381	38.9231	64.006	40.0737	37.2728	40.6634	39.2775	89.5719	86.0645	75.2425	48.1773	58.8944	113.578	67.0502	60.1006	113.685	71.3134	38.4026	100.32	55.312	69.8216	70.8276	65.5793	123.157	118.757	98.362	73.383	80.3701	74.5281	80.2436	83.762	99.7268	45.2723	71.0265	52.1994	101.984	81.0506	82.8941	91.8567	65.9668
	1900-01-01 06:44:00	OFF	70.7332	56.775	89.0229	36.5221	35.6283	29.0663	38.8371	50.9009	37.7151	64.5362	39.8494	37.2462	43.5489	39.1438	90.7489	85.7169	70.8634	48.9954	59.8042	101.701	59.7592	58.8659	114.554	68.3522	39.8792	98.2653	59.2883	77.9187	67.4279	52.6622	133.741	102.485	92.435	80.9944	83.5812	70.9285	84.9062	87.9215	98.0353	47.4378	69.7569	52.2128	100.638	84.7826	83.3178	92.9009	59.4438
	1900-01-01 07:00:00	ON	74.709	53.4851	83.7501	44.9826	45.5451	30.7244	44.0177	49.3305	48.2699	56.5877	49.1732	60.7711	52.0043	42.5794	74.3186	109.981	82.3116	57.4288	60.4212	98.1534	75.5247	64.5335	122.951	70.2938	53.1228	96.5956	79.3078	76.8011	85.7154	54.2552	106.34	97.598	107.693	79.5772	100.422	78.9371	92.5129	97.9606	83.0092	57.7256	71.1034	68.9785	106.06	106.873	88.1797	114.883	72.5081
	1900-01-01 07:16:00	ON	128.004	143.276	149.439	97.9501	122.678	92.7152	145.723	106.232	142.161	117.362	123.92	174.718	119.11	143.226	165.749	207.287	173.408	140.308	180.893	156.389	154.891	174.535	192.029	163.655	150.468	157.72	187.956	145.323	198.022	153.555	158.332	222.984	193.786	182.651	244.516	157.477	145.695	222.727	150.376	174.423	140.009	180.968	270.918	231.037	165.257	256.661	140.615
	1900-01-01 07:32:00	ON	158.773	204.297	192.513	120.307	117.504	115.612	146.32	147.593	137.409	153.529	136.514	152.723	128.283	160.861	198.273	203.852	220.987	157.917	188.774	206.283	179.261	186.428	215.129	229.318	161.541	201.107	182.154	194.78	200.586	170.03	224.556	299.561	217.722	197.398	269.221	186.856	168.462	262.998	207.36	198.367	165.45	201.012	317.566	306.255	211.259	260.239	193.199
	1900-01-01 07:48:00	ON	145.015	194.185	172.45	121.217	104.202	111.011	132.034	133.743	138.243	135.698	136.186	138.012	119.039	144.441	227.38	222.137	231.314	184.238	200.812	202.831	196.856	201.584	227.694	246.791	177.388	206.965	194.05	216.943	220.96	196.325	258.944	327.423	231.855	215.666	277.766	201.003	207.565	280.169	234.169	207.224	183.314	216.829	328.571	321.936	222.161	277.875	199.214
	1900-01-01 08:04:00	ON	135.935	173.691	161.885	94.4145	86.139	100.483	105.134	126.889	99.9011	119.586	117.041	119.806	109.25	116.083	227.773	219.629	236.59	172.581	207.786	200.085	179.325	212.834	228.113	239.122	166.808	212.64	190.788	202.009	209.535	183.98	260.432	333.599	236.602	215.094	295.6	218.115	213.725	299.809	225.508	189.049	183.46	199.812	332.074	315.128	204.615	274.053	191.749
	1900-01-01 08:20:00	ON	112.662	174.455	135.597	94.408	73.8097	70.7645	94.2125	116.297	91.8624	100.166	110.965	107.313	98.3175	118.112	197.848	211.096	218.695	161.649	202.345	197.745	190.288	209.673	230.939	262.02	162.297	198.155	178.297	197.38	192.105	178.633	257.022	312.556	233.946	208.695	260.529	206.837	203.976	281.922	216.368	178.169	165.792	183.442	326.984	301.269	209.919	241.583	175.967
	1900-01-01 08:36:00	ON	116.558	151.453	143.054	85.2383	77.1823	87.272	86.7881	121.442	91.5066	103.821	109.875	103.392	102.6	113.351	213.775	207.765	214.501	176.488	202.416	198.006	172.549	206.155	229.661	251.629	156.14	196.569	185.226	206.108	212.509	177.273	258.89	296.262	234.755	215.207	251.542	213.588	201.194	282.777	214.013	170.81	181.378	176.766	296.454	290.66	181.915	242.135	174.055
	1900-01-01 08:52:00	ON	127.539	178.177	144.572	101.599	87.4989	91.453	105.733	126.35	96.543	114.378	112.778	118.857	109.756	132.881	213.211	222.691	232.666	167.883	216.495	203.222	208.497	221.696	229.972	286.009	178.349	212.96	201.921	202.254	215.411	188.619	268.309	313.526	240.249	220.08	246.698	216.358	190.951	284.944	226.767	178.51	180.901	190.768	343.76	304.71	208.377	244.692	182.353
	1900-01-01 09:08:00	ON	141.843	191.12	158.644	105.411	85.6305	100.509	110.406	136.587	112.922	121.391	125.532	128.561	121.575	123.558	234.318	219.859	253.362	197.09	225.373	212.735	219.051	227.495	250.761	294.418	192.202	226.277	211.532	215.089	232.105	209.773	280.119	322.428	253.837	228.974	241.268	216.943	212.106	286.734	246.106	199.746	191.646	198.648	337.045	321.272	215.374	252.243	196.125
	1900-01-01 09:24:00	ON	151.365	199.109	171.852	98.9973	85.8923	104.551	108.848	156.177	112.093	126.396	124.713	127.295	132.37	144.306	247.723	242.654	250.202	207.057	234.966	218.625	216.397	245.078	260.49	316.355	201.91	241.2	219.427	238.333	246.709	222.103	278.483	367.86	275.73	256.385	285.851	235.127	219.239	315.322	256.755	199.801	199.714	202.876	389.504	332.816	210.451	287.919	213.259
	1900-01-01 09:40:00	ON	161.932	205.817	168.698	114.13	88.5309	101.796	108.62	148.352	111.808	129.944	132.73	121.549	132.763	140.541	240.639	242.594	275.929	218.531	238.794	228.087	234.557	252.719	264.659	326.568	206.844	244.478	227.977	247.557	253.542	220.761	298.73	393.479	275.086	262.22	284.421	225.19	217.492	320.166	256.219	200.193	196.851	216.732	353.331	339.201	232.094	279.296	221.584
	1900-01-01 09:56:00	ON	167.156	198.913	179.87	101.066	88.3035	107.675	102.285	152.608	101.589	134.619	132.342	127.594	137.772	147.275	256.648	238.614	290.442	224.89	245.476	228.062	236.772	257.147	280.613	344.149	203.269	261.991	231.325	240.074	258.875	215.813	306.054	379.622	281.528	271.119	274.733	249.321	235.316	313.212	267.525	184.422	212.969	229.082	383.38	328.809	207.37	268.175	233.469
	1900-01-01 10:12:00	ON	173.819	212.241	190.929	112.258	88.2844	100.682	116.362	165.236	117.998	135.012	128.972	127.33	139.9	156.085	248.046	258.977	299.728	226.444	247.248	242.634	249.641	261.788	280.776	343.935	228.302	257.82	240.041	263.338	259.985	227.154	322.32	409.254	292.282	271.302	305.349	230.708	223.426	329.871	275.23	206.518	196.553	224.809	380.726	362.118	238.83	297.012	237.299
	1900-01-01 10:28:00	ON	173.288	195.706	NA	113.736	87.9	112.809	116.942	NA	117.544	137.524	133.076	126.087	142.459	142.804	256.147	252.399	NA	234.199	249.414	240.008	248.399	269.481	285.034	326.608	226.974	261.454	240.556	NA	263.069	233.255	NA	NA	300.57	292.79	302.867	242.658	239.423	340.107	287.221	204.397	211.894	219.959	375.308	348.597	242.341	293.011	243.615
	1900-01-01 10:44:00	ON	184.221	217.364	NA	105.965	87.9833	108.531	108.115	NA	114.995	141.735	128.781	124.916	146.394	151.175	235.501	236.647	NA	246.928	242.592	234.361	232.845	264.165	286.58	343.638	222.463	258.356	231.832	NA	247.819	231.035	NA	NA	337.322	291.152	268.324	220.649	232.588	323.034	284.707	207.099	188.252	216.9	385.333	347.248	251.759	275.34	242.089
	1900-01-01 11:00:00	ON	183.813	198.321	NA	113.319	77.474	111.839	106.537	NA	110.514	136.311	133.986	123.281	148.425	140.617	261.783	263.299	NA	251.12	246.604	246.714	252.791	263.124	287.608	323.559	224.194	260.944	224.734	NA	265.713	223.527	NA	NA	309.85	283.311	303.35	232.11	244.357	338.268	281.395	196.412	215.926	210.259	363.404	331.439	242.323	294.769	251.288
	1900-01-01 11:16:00	ON	191.022	207.06	NA	102.589	89.5701	105.033	109.099	NA	118.424	136.965	122.915	126.002	147.654	152.212	260.821	249.687	NA	246.31	245.699	241.039	240.243	267.812	295.361	348.827	223.211	255.467	237.366	NA	251.269	238.451	NA	NA	315.773	301.474	308.524	215.967	239.654	341.356	282.502	186.024	200.728	220.84	392.459	371.633	228.47	292.45	241.625
	1900-01-01 11:32:00	ON	185.204	194.88	NA	109.649	88.8648	105.806	112.406	NA	114.14	131.821	129.295	122.057	144.27	141.041	238.403	251.289	NA	259.695	228.761	233.175	251.483	247.772	290.513	324.01	230.462	258.718	244.181	NA	264.781	234	NA	NA	321.832	302.443	284.638	228.076	244.945	312.057	281.937	202.161	212.838	221.88	373.163	343.264	241.633	284.986	248.52
	1900-01-01 11:48:00	ON	182.636	208.828	NA	96.6868	81.7009	105.58	110.787	NA	111.028	134.074	120.669	115.388	140.901	148.946	256.229	253.411	NA	244.078	237.841	230.887	227.98	263.859	282.042	346.46	232.591	253.371	233.628	NA	246.297	232.387	NA	NA	310.503	290.109	308.362	226.079	238.6	334.701	283.291	197.728	190.647	189.256	384.595	314.238	221.816	295.917	249.369
	1900-01-01 12:04:00	ON	177.444	194.077	NA	105.689	89.6658	107.707	112.926	NA	109.309	127.073	128.412	123.147	139.442	141.755	238.871	242.894	NA	258.287	238.111	238.456	244.644	259.469	276.399	320.934	230.091	255.686	244.811	NA	263.142	236.945	NA	NA	304.965	286.698	298.903	212.057	234.951	320.374	281.14	206.549	204.608	212.973	362.036	354.67	232.245	282.716	249.38
	1900-01-01 12:20:00	ON	170.074	204.42	NA	94.9477	90.518	107.577	109.792	NA	114.828	128.017	130.02	120.982	137.213	147.866	253.298	252.015	NA	248.809	222.596	228.258	228.297	255.673	258.942	333.642	232.226	256.197	237.545	NA	230.899	237.429	NA	NA	308.577	267.236	302.357	228.109	251.002	315.662	276.278	199.673	203.393	209.515	392.518	344.418	218.67	289.84	243.257
	1900-01-01 12:36:00	ON	166.245	184.125	NA	104.724	86.4215	103.965	103.675	NA	102.358	122.389	122.236	117.4	130.335	140.337	238.051	234.468	NA	258.154	238.388	221.261	236.165	259.989	256.905	316.72	221.165	252.958	227.864	NA	257.769	232.469	NA	NA	303.951	274.987	306.746	202.383	231.172	324.176	278.142	196.383	196.359	207.9	364.104	320.294	230.011	282.914	244.293
	1900-01-01 12:52:00	ON	164.338	188.63	NA	98.6681	97.1948	105.315	105.577	NA	113.198	123.489	123.76	124.665	127.849	146.977	247.499	249.573	NA	245.625	225.209	219.807	221.696	238.429	251.179	327.016	233.559	243.518	239.345	NA	247.009	227.329	NA	NA	297.255	273.495	300.446	221.148	245.91	295.401	264.478	196.766	198.186	217.456	383.247	343.314	215.079	276.709	230.402
	1900-01-01 13:08:00	ON	153.848	178.132	161.585	106.551	89.7549	97.1793	106.377	146.248	114.017	120.423	123.951	118.986	124.991	142.956	238.03	250.67	286.901	251.006	238.08	215.384	222.208	253.961	242.296	311.108	221.509	239.522	231.426	243.881	248.837	234.989	291.961	426.878	290.303	267.36	321.049	203.153	227.868	317.705	258.621	197.191	201.298	204.977	357.905	317.875	228.565	286.543	237.998
	1900-01-01 13:24:00	ON	145.49	182.446	158.301	102.155	90.5125	100.223	99.3126	148.091	101.871	118.515	127.938	114.009	122.429	147.451	241.87	236.453	273.949	236.388	234.358	212.77	231.65	252.124	239.419	323.032	223.268	236.332	225.954	236.459	242.37	215.679	301.318	414.087	285.268	259.092	289.435	212.703	242.766	295.339	255.329	188.082	195.387	214.319	381.327	303.646	223.189	269.249	229.32
	1900-01-01 13:40:00	ON	141.677	181.554	157.545	92.4239	93.9942	94.8474	105.984	142.291	106.651	115.482	116.18	119.349	117.139	140.183	221.363	243.395	272.772	241.007	226.687	207.843	218.733	245.651	232.351	298.671	221.176	230.521	230.49	221.362	240.852	209.091	283.84	410.504	287.962	255.352	310.159	199.345	231.718	303.659	257.317	193.587	188.536	209.234	358.162	327.761	217.429	280.054	216.434
	1900-01-01 13:56:00	ON	139.778	169.825	155.899	98.6592	85.4133	100.674	100.133	145.39	107.237	111.085	120.335	113.099	116.401	143.891	228.597	234.787	259.612	228.716	223.961	198.899	218.899	242.517	226.796	307.645	211.356	224.69	214.186	225.145	236.161	217.797	272.742	401.141	281.012	246.525	299.23	205.093	238.331	297.206	245.041	189.248	186.401	184.852	369.59	307.119	218.683	260.176	224.619
	1900-01-01 14:12:00	ON	134.166	170.694	150.096	92.4573	89.6683	88.8434	98.2116	143.429	94.5941	107.856	115.013	114.513	114.794	137.932	229.05	233.926	269.892	243.294	196.329	194.587	205.813	224.371	225.199	305.123	208.601	219.895	222.946	222.165	231.604	193.157	250.093	402.338	275.794	244.265	273.226	194.999	231.081	277.313	244.253	180.781	171.357	196.928	332.921	309.924	205.877	260.091	219.348
	1900-01-01 14:28:00	ON	131.027	164.573	148.48	92.446	88.2522	97.8346	98.3249	144.522	102.799	102.869	115.287	114.602	107.793	139.152	219.233	233.485	239.876	239.342	216.357	192.734	213.236	239.968	220.467	291.089	205.661	211.739	212.422	217.209	234.291	204.126	256.209	383.98	268.328	241.047	291.326	206.669	219.774	296.96	235.84	186.066	183.189	195.68	357.93	313.862	214.38	266.772	210.668
	1900-01-01 14:44:00	ON	124.947	163.617	141.553	94.0465	84.0834	85.4174	87.508	133.39	96.6888	96.4505	118.553	101.237	107.091	140.707	217.018	223.152	245.446	226.477	216.142	186.252	218.437	233.834	209.478	294.913	182.9	207.107	217.126	208.88	222.533	203.514	251.401	382.914	261.154	233.576	282.341	191.112	229.347	278.714	234.305	156.661	167.669	176.679	348.509	285.217	210.565	251.576	208.094
	1900-01-01 15:00:00	ON	119.316	150.679	139.286	80.7573	84.0229	92.2123	89.6334	131.831	95.5093	103.653	108.245	106.926	101.998	129.758	216.129	221.568	235.014	243.127	194.012	186.537	203.374	217.098	204.439	268.513	191.352	207.557	214.324	210.756	240.528	173.76	243.6	356.133	260.221	224.566	249.737	194.896	222.275	257.989	234.296	172.722	184.071	182.451	343.061	282.39	186.744	248.014	203.587
	1900-01-01 15:16:00	ON	114.792	150.941	127.373	85.2639	82.1012	92.7733	87.1239	118.889	94.0311	100.884	111.737	103.57	100.405	134.309	197.634	214.294	222.625	219.135	203.305	175.698	201.14	219.474	198.914	280.512	185.404	200.766	193.423	196.484	236.072	191.338	239.273	363.446	253.481	213.116	260.825	206.19	208.103	269.257	224.403	168.042	178.686	168.78	336.518	283.969	203.121	240.277	198.025
	1900-01-01 15:32:00	ON	107.682	136.246	116.688	80.5024	77.8822	82.5329	78.4758	107.451	88.6485	95.0969	108.281	92.299	94.6124	129.884	211.856	207.405	207.256	230.853	190.796	176.924	184.508	205.311	189.929	267.337	189.886	193.598	196.481	176.225	216.845	166.85	220.633	327.776	237.664	205.676	249.448	194.199	225.441	247.901	209.168	155.89	171.657	170.359	331.27	253.197	182.697	226.975	192.094
	1900-01-01 15:48:00	ON	105.417	139.388	108.015	81.1788	78.1079	83.9704	87.8389	99.0737	90.6992	91.5625	103.084	100.217	93.4736	126.803	192.239	203.062	196.554	220.329	187.56	166.338	189.733	196.586	187.736	275.48	180.914	190.063	200.465	171.393	219.281	181.585	213.785	294.912	238.865	197.009	233.526	196.251	196.51	234.403	203.672	159.753	173.241	170.899	315.415	264.334	190.223	211.4	187.987
	1900-01-01 16:04:00	ON	100.044	123.035	100.192	70.5752	70.3904	80.3159	76.9635	96.7656	92.3304	85.3499	101.054	95.3701	90.4085	115.821	196.876	205.799	190.367	200.526	190.07	157.582	189.293	206.994	182.632	252.146	170.991	178.687	189.449	165.121	203.074	180.877	198.874	275.652	240.131	195.392	240.438	182.797	202.362	245.872	199.441	154.82	150.396	150.995	321.311	265.008	162.287	220.16	184.786
	1900-01-01 16:20:00	ON	94.8952	122.887	93.9165	71.3953	70.8804	74.426	80.1191	89.743	84.0616	76.6717	92.5452	91.499	86.1882	116.037	183.086	185.502	175.623	203.795	177.723	159.556	168.713	190.669	175.732	256.082	177.816	174.632	195.02	147.587	203.22	160.053	187.114	267.441	222.798	189.567	214.256	178.519	191.352	225.579	194.573	152.539	153.311	160.909	307.813	239.621	166.313	180.293	178.696
	1900-01-01 16:36:00	ON	94.2721	114.766	96.9613	74.2933	66.2974	70.1602	77.3238	85.0255	82.0888	74.598	91.6035	87.6824	84.6696	105.594	184.991	190.845	163.983	181.183	161	152.512	175.469	181.051	171.809	239.451	169.762	168.714	179.476	140.198	172.576	165.541	178.231	249.513	224.403	176.723	207.149	173.416	191.227	212.281	190.065	154.98	141.117	148.206	287.959	240.892	166.838	192.499	177.627
	1900-01-01 16:52:00	ON	90.2686	108.741	91.4897	71.7133	63.3251	65.3219	66.0096	83.3648	79.3132	70.066	86.061	79.1601	83.994	108.332	177.477	186.594	156.516	184.563	172.141	148.543	162.674	186.384	170.72	242.333	161.381	167.195	188.167	138.237	180.057	159.649	168.229	239.831	218.776	164.723	207.185	160.805	186.881	211.794	181.773	140.857	138.939	147.418	286.117	230.605	150.741	189.83	173.406
	1900-01-01 17:08:00	ON	89.6606	100.107	92.2385	74.734	64.0164	67.8119	68.175	79.4759	69.675	67.4047	88.163	81.2556	83.0506	102.43	170.448	188.123	150.5	159.387	162.78	143.778	164.081	169.307	170.09	227.149	163.637	163.111	185.343	129.369	171.465	155.766	162.613	224.746	217.092	172.284	183.241	158.86	175.813	196.566	183.158	142.175	137.298	145.06	265.817	213.446	164.705	177.569	158.543
	1900-01-01 17:24:00	ON	87.9878	110.751	86.5947	72.7581	56.766	58.6176	61.2459	75.042	77.7241	65.6768	88.4013	81.8891	80.7617	110.477	177.754	187.778	144.954	167.271	161.096	136.048	168.037	175.025	170.397	241.365	153.728	161.964	168.887	128.545	165.52	152.905	156.537	217.178	220.607	174.953	192.82	142.518	183.469	201.375	178.717	137.26	123.852	134.174	282.87	225.217	155.346	183.435	155.051
	1900-01-01 17:40:00	ON	88.0893	106.527	88.0299	71.2904	60.4094	64.1807	63.8339	71.2737	71.1973	63.1554	82.3976	75.8038	81.1011	98.5983	168.79	175.255	143.85	168.934	162.831	134.896	155.296	171.502	164.828	239.066	145.861	157.287	171.389	126.112	168.676	159.242	161.453	213.171	215.537	171.982	188.018	150.034	170.033	196.353	173.408	131.289	130.199	135.96	266.066	211.2	152.92	172.456	155.403
	1900-01-01 17:56:00	ON	86.8072	100.285	89.785	70.941	57.735	64.033	59.6614	73.8015	57.8465	62.9552	84.1371	69.2521	77.2255	94.625	165.141	156.263	142.764	150.424	152.926	139.702	160.983	162.843	168.717	230.78	142.208	152.329	144.997	131.081	152.058	146.822	160.406	211.356	213.523	172.051	170.443	147.448	169.374	182.512	173.855	126.767	127.144	127.893	266.362	190.746	153.299	150.803	154.462
	1900-01-01 18:12:00	ON	86.3011	98.0803	89.2981	66.003	52.6145	56.6832	55.7483	75.0007	66.7467	64.7921	84.0926	71.1288	77.1167	96.2344	166.627	164.849	141.232	159.594	137.958	137.131	159.192	148.392	163.135	227.04	129.314	155.125	159.327	130.646	152.566	139.22	156.866	215.224	213.473	170.981	163.964	138.421	172.361	172.893	173.081	116.354	123.998	112.083	242.075	203.122	142.554	152.323	150.531
	1900-01-01 18:28:00	ON	85.6427	88.4218	86.7996	73.3943	54.7032	59.2889	58.5755	77.749	64.7639	61.969	76.4728	60.7731	77.5104	87.9634	158	160.692	142.6	153.754	145.464	133.463	154.459	148.297	159.597	210.336	137.01	153.436	159.194	129.529	151.133	145.734	161.115	211.363	206.898	164.483	165.591	141.271	166.308	175.868	162.368	118.855	123.179	123.672	244.218	192.831	150.356	155.646	148.016
	1900-01-01 18:44:00	ON	83.4427	90.3639	88.7652	70.006	55.2944	55.046	59.742	77.2502	60.7282	61.7369	80.1689	68.8125	77.0073	88.2923	168.628	153.623	140.835	157.443	140.834	132.108	155.412	149.132	158.797	213.416	139.341	151.093	150.171	134.484	146.277	136.069	169.001	216.035	207.915	166.618	158.85	130.553	175.923	165.983	162.166	118.741	117.95	118.779	237.524	190.11	146.254	148.306	149.915
	1900-01-01 19:00:00	OFF	82.1869	81.7539	77.273	58.3812	48.8412	62.1007	47.8669	70.0568	62.7429	56.2173	68.5033	45.8609	74.7182	75.9961	174.371	167.874	143.401	161.668	137.463	135.187	153.47	151.699	160.439	208.691	130.767	150.207	148.832	130.244	163.251	150.011	165.4	218.346	214.771	164.522	157.15	159.72	171.517	168.443	163.294	112.234	129.765	105.833	231.695	187.384	137.98	150.354	152.509
	1900-01-01 19:16:00	OFF	15.8874	8.0305	15.0891	-2.39115	-8.36737	-3.17942	-3.55634	9.3242	0.962429	1.4849	2.55395	-1.66492	5.45852	2.18693	25.036	59.7578	18.5047	20.0319	25.2364	32.9367	22.7084	30.186	59.3372	40.3712	12.0969	38.776	20.328	26.4957	13.9017	22.6988	32.9637	27.3733	66.542	27.7506	16.0935	23.0379	22.3799	19.8839	28.8777	-0.76456	21.6003	2.47705	18.723	17.1405	15.3983	20.3497	17.7977
	1900-01-01 19:32:00	OFF	15.0652	7.48114	13.1733	-2.1343	-8.98808	-2.76883	-2.64244	9.73234	-2.09083	-0.725511	1.27984	-3.13233	3.54627	2.58449	23.1901	53.7809	19.5966	16.6811	26.0854	25.6544	20.2599	26.9844	51.7449	38.169	11.4004	31.9733	16.8074	21.1638	14.5723	21.953	20.1638	22.1342	48.2283	21.6668	15.7072	20.7239	23.0829	21.5643	21.1576	1.85505	21.8857	1.84699	12.2918	18.4604	4.5153	18.5473	10.2918
	1900-01-01 19:48:00	OFF	15.3548	8.15136	13.1672	-2.46419	-6.88064	-3.98034	-2.92741	11.2126	-0.47459	-0.469308	1.16509	-1.52698	3.82415	2.82055	32.0658	54.7399	22.425	14.0288	33.1611	30.3721	24.8233	31.746	55.6921	51.0657	17.3342	37.322	22.8981	17.2671	22.4441	23.1013	29.7775	26.4343	47.7212	24.3572	20.6164	31.1326	27.8781	29.8531	24.7494	11.0519	24.9431	-1.28325	31.6803	22.0816	18.8701	22.3743	15.9434
	1900-01-01 20:04:00	OFF	21.1974	18.4345	19.9888	4.45212	-2.09897	-4.94703	4.1849	10.3737	-4.98181	2.1247	8.13426	-2.07899	7.9308	10.2516	44.8782	60.097	27.9274	26.2703	46.5824	28.6662	39.6685	40.4195	55.1112	77.7986	30.3668	40.6289	31.4519	29.1317	36.7043	26.9857	40.2009	47.134	51.2248	27.6166	37.2753	40.3916	43.4877	47.351	28.7645	21.6095	24.4884	20.1593	59.2708	34.9856	30.7536	38.1034	23.351
	1900-01-01 20:20:00	OFF	22.0798	19.557	21.8578	8.27018	0.98101	-0.764766	10.4637	11.6505	7.70432	5.93103	11.1247	3.31437	10.5779	16.9407	53.2744	63.4049	36.5643	36.8309	55.5601	33.9678	43.4494	48.9273	63.469	90.3889	39.7527	48.9501	36.3	35.4635	56.103	28.71	44.9481	60.6109	55.6958	38.1747	49.5683	52.5546	56.5287	61.7396	34.0852	30.6054	33.1585	31.7569	78.5074	53.4289	45.0809	47.7363	30.2736
	1900-01-01 20:36:00	OFF	26.9317	32.5353	27.1805	10.5039	7.94779	3.71348	16.6672	16.6383	9.17281	10.2256	17.8899	4.95733	8.57768	21.1428	56.7076	64.0382	38.1825	32.9169	60.687	44.1082	50.6144	50.9057	66.6449	109.338	37.5714	56.6916	43.1618	40.7482	62.4354	37.7576	51.5112	60.927	58.8827	41.0099	59.6787	57.8921	60.3952	70.1711	40.0869	38.6181	37.3808	34.4764	102.655	59.9449	61.1966	53.7971	37.0408
	1900-01-01 20:52:00	OFF	26.8164	34.1534	30.9203	14.328	5.89786	2.18373	13.6599	16.8569	11.3568	10.4252	20.2431	3.13958	8.24286	24.2781	66.9718	62.6457	39.1653	45.9091	51.202	47.2248	56.4875	46.5667	73.409	111.314	40.5249	58.6373	43.5467	39.9766	74.7397	35.9347	59.7475	66.2417	60.3943	46.2758	58.2307	51.707	69.1331	66.3444	43.0669	29.0817	36.8976	32.8794	104.021	60.5792	57.201	55.9542	39.1469
	1900-01-01 21:08:00	OFF	32.788	28.7015	28.9282	16.3059	6.44677	7.14664	14.7868	16.306	8.98222	12.9202	17.8502	6.90243	10.0439	21.8862	52.1385	65.2152	36.935	43.1377	50.1025	45.2543	55.8309	46.2182	73.5878	99.9648	36.5692	57.4697	42.9493	29.6389	66.1605	36.3202	56.7718	62.781	65.9403	51.5015	57.5782	56.7418	60.948	63.2164	40.5665	32.8049	40.5115	37.1739	98.9471	63.0613	62.837	57.8499	38.9058
	1900-01-01 21:24:00	OFF	32.0542	29.8239	32.0364	14.5237	7.50418	5.38173	14.3813	15.0469	9.09261	11.5315	18.7619	7.63804	8.20211	22.4892	57.7634	60.2698	31.9782	38.0089	43.2362	45.785	51.8165	40.4779	75.3301	91.4973	34.6137	54.7193	40.7703	39.0146	50.7989	39.0469	58.3322	58.2941	68.0571	48.3645	48.2721	51.7372	63.5018	56.2502	41.2934	28.984	33.1045	34.6469	86.1461	55.6895	57.8611	53.937	35.559
	1900-01-01 21:40:00	OFF	31.8786	30.3587	32.0033	11.6997	7.34241	4.16666	13.0908	19.0372	9.61591	15.2671	18.1866	5.98128	8.93343	20.9824	57.1307	53.9066	31.1696	38.2165	37.4107	37.2315	40.7597	36.0586	73.8316	76.3221	29.8342	53.8181	35.7472	30.3395	49.1167	35.1989	50.0501	56.9225	71.0938	46.3467	43.1412	48.3387	55.4666	48.5272	40.357	25.6781	37.2806	28.1567	70.7114	49.4038	49.7266	44.8433	33.8567
	1900-01-01 21:56:00	OFF	32.1029	27.8476	30.4861	15.2103	5.97594	4.8753	12.1836	19.3434	9.64683	12.0918	16.7658	5.20567	11.9962	22.4575	47.3204	52.3649	26.0115	36.7805	33.3299	45.213	40.7891	31.849	68.4577	74.6181	25.3565	48.872	39.8864	27.1326	45.4027	33.046	53.0231	50.5744	71.0903	47.8302	34.8887	45.348	50.3609	42.0915	38.2204	25.2961	37.0654	23.2715	70.5888	45.2359	50.3361	41.5475	32.32
	1900-01-01 22:12:00	OFF	35.7784	26.2466	29.8378	14.7123	8.65605	6.20383	15.2614	16.4954	5.93698	12.9668	18.0731	8.29961	15.1041	21.1864	57.4211	53.7021	32.8565	34.0328	31.8503	39.8876	44.0003	32.132	75.0553	72.6705	26.1468	50.0639	34.9908	32.4978	40.3358	27.3885	51.2681	55.7454	63.9521	45.3718	37.7164	41.2473	53.1205	40.1881	37.9835	23.3836	34.568	27.035	66.1142	44.9927	47.8194	39.1937	31.9972
	1900-01-01 22:28:00	OFF	38.6201	23.3544	33.6868	16.6483	9.36264	4.98415	16.7744	14.5758	11.0062	14.5459	18.8795	9.24597	19.21	24.0887	53.3213	51.2884	32.1533	29.2331	33.3067	37.7671	40.2821	34.8097	74.4514	62.7927	24.9922	48.7928	34.8854	27.5996	32.8935	30.6809	57.4643	46.4264	71.2801	42.9402	36.056	40.6072	50.8047	40.7529	39.3197	24.9486	32.74	29.2306	64.7167	42.8598	45.5512	37.639	32.7386
	1900-01-01 22:44:00	OFF	37.5876	27.0541	33.5733	12.6684	11.11	7.0407	18.1967	16.6874	10.4463	13.9366	18.3711	9.70101	19.7902	21.6143	52.3107	48.6769	31.4165	28.7742	32.1172	39.8275	35.8486	31.7203	73.6011	68.7729	28.5585	51.0336	33.5308	25.592	36.8049	29.9308	55.9291	53.4725	65.9782	48.2528	34.6991	39.1818	48.3915	42.9102	37.756	22.7034	33.1676	27.907	63.0988	43.3343	46.0765	36.7094	30.8698
	1900-01-01 23:00:00	OFF	38.2306	23.7217	30.1827	18.474	7.62503	7.44857	16.0544	14.7881	8.75001	16.424	19.8817	11.7798	20.1079	22.3037	53.8522	45.8858	33.6232	30.1685	30.9814	39.3291	40.2465	30.7125	66.6453	66.3513	23.0012	48.6593	34.7625	27.3826	34.7253	28.8907	50.1318	53.3118	66.6188	43.6537	34.0512	41.4429	52.6149	38.4787	36.3161	23.3473	31.2178	23.3188	58.1714	44.8411	44.0717	34.9642	32.667
	1900-01-01 23:16:00	OFF	36.7008	27.5075	26.0548	16.6561	11.8243	7.8126	20.1044	19.2932	9.51835	17.6437	20.0823	11.2791	20.0513	25.4553	53.0617	47.0711	27.514	27.8695	28.386	41.2779	38.9976	28.96	69.5639	67.9547	23.42	46.7284	32.7829	27.1212	33.1229	26.6574	49.4244	53.5267	72.0528	48.3291	34.8814	39.8018	51.117	38.2993	36.0089	28.3065	32.21	28.2043	64.7596	40.8546	38.1038	33.9459	32.1127
	1900-01-01 23:32:00	OFF	38.0393	28.3706	34.4384	17.7963	14.3824	9.18484	19.4647	20.4372	9.63473	16.0556	18.3047	13.3036	19.5216	24.7325	50.6901	48.2829	31.8482	30.5969	29.4528	33.5793	40.8926	29.8054	69.0211	63.8958	22.7492	47.5156	33.7128	31.3162	36.3031	16.998	42.3546	55.2815	66.8146	45.7932	35.2602	37.0837	50.0682	38.3372	38.2271	25.7122	31.7173	27.7321	62.5799	42.8128	41.9397	34.8029	34.7612
	1900-01-01 23:48:00	OFF	35.2615	26.0186	36.5747	17.7927	13.422	9.25461	19.8043	22.0056	14.8522	19.2125	20.0758	13.9646	19.6341	26.9955	50.6112	43.6899	27.5725	32.2751	26.9397	40.5919	40.1194	28.8997	65.875	62.356	24.2966	48.4739	34.2787	29.4653	38.1831	30.8637	47.7361	50.6011	68.7839	47.8722	34.2795	37.367	48.1262	39.6632	36.4372	26.866	32.1015	26.8315	63.2082	44.01	42.721	33.3506	32.0326
	1900-01-02 00:04:00	OFF	36.6812	29.7503	41.0549	17.9265	6.72658	8.99185	22.0138	21.8814	14.4563	17.9263	21.6527	13.1974	12.7036	26.0012	49.5842	45.0485	31.1795	28.3505	26.1582	38.4096	36.6117	28.4147	66.2845	59.392	24.1893	48.2674	31.79	25.7421	36.7842	30.4506	47.6424	59.0575	62.8146	46.4162	33.4597	39.4792	49.1195	38.2444	39.1327	25.761	31.5491	22.713	66.0588	47.6274	43.1745	32.0548	34.058
	1900-01-02 00:20:00	OFF	37.0646	30.5245	32.9597	20.2773	14.783	12.2909	23.0293	21.3744	12.5623	20.0516	23.2221	14.6951	12.9234	19.7639	49.7525	43.6673	31.6774	29.809	24.791	37.2805	41.3639	27.5792	69.8251	60.3411	26.016	47.9344	37.2672	27.3903	36.1211	30.169	50.2511	57.4923	61.7465	44.9602	33.7044	37.9972	46.645	38.4009	37.0644	22.3996	33.8246	29.4037	60.2918	44.4134	44.6308	33.8721	30.1828
	1900-01-02 00:36:00	OFF	39.547	33.1395	34.8821	20.3839	18.6843	9.0433	22.0829	20.4648	14.3685	20.2633	23.3564	15.5474	17.0076	27.5985	51.3787	42.2564	30.4953	31.476	28.1243	38.4631	41.4061	29.1821	66.4389	61.3094	27.6154	47.2747	34.9057	32.8121	39.6168	29.2405	48.7383	48.8124	60.696	43.8838	36.0576	39.3041	49.6551	40.7397	37.2268	25.432	32.8142	28.9836	66.4864	45.4836	45.5603	33.739	34.8132
	1900-01-02 00:52:00	OFF	42.6221	32.2239	38.4944	14.1143	18.1859	10.9402	22.6964	22.5063	13.7311	21.633	24.0474	16.9616	19.2307	28.903	50.2765	43.1843	32.6303	30.954	26.9982	39.0457	39.9883	28.4384	72.6967	64.2056	27.7673	50.8254	35.1973	31.7285	40.5141	28.9592	46.2403	59.8453	65.7106	41.8969	37.6806	39.498	46.6618	40.2863	40.098	26.08	30.1762	27.7328	68.8006	47.1749	41.4417	34.929	34.5801
	1900-01-02 01:08:00	OFF	38.9686	32.9141	38.9648	19.622	16.781	10.5624	20.7649	22.0101	17.061	20.2074	25.7815	16.3883	19.5581	21.5436	47.0027	43.1823	31.0651	33.9759	26.7882	42.9086	42.8662	29.1168	66.3275	61.3675	27.1354	52.0264	37.0937	28.4203	37.6171	30.3517	53.6264	55.6539	66.0499	44.9545	37.4127	35.6551	49.2726	42.4914	40.1208	25.4325	34.317	27.4816	59.9616	47.6314	44.3688	36.4776	36.4723
	1900-01-02 01:24:00	OFF	35.914	35.2343	38.8509	21.5157	13.0151	11.4324	21.429	20.243	15.9497	21.993	24.6066	16.551	24.111	31.0262	53.761	41.6605	30.9921	33.2124	29.4398	38.4781	44.2385	28.4097	67.8201	61.7934	24.0271	48.91	32.1154	25.5708	44.2223	31.3617	51.9338	55.319	63.6055	40.6885	37.5334	41.2495	50.1819	41.6552	38.9748	25.1265	31.7196	23.8939	67.6089	47.6525	45.4397	36.1401	32.2289
	1900-01-02 01:40:00	OFF	37.7587	35.4721	40.7864	17.1032	16.4127	13.4302	24.224	22.7465	17.3797	22.2925	25.8254	14.8092	25.0618	31.2468	53.5481	42.0076	29.0281	31.8233	27.8445	36.6508	41.6016	29.8553	68.1232	62.5933	27.0427	47.7419	36.4658	31.4372	34.513	30.5943	49.316	60.2201	61.8274	45.6367	36.9452	42.0161	48.9448	40.7902	39.5491	23.8038	29.9848	27.2839	72.8007	45.1859	46.0473	37.2156	33.5554
	1900-01-02 01:56:00	OFF	39.8165	36.8146	39.6901	22.9285	17.3668	13.9583	25.1272	20.1434	13.5561	24.1363	25.2721	16.5656	27.9624	27.3104	55.5803	42.9973	29.9609	32.1854	28.3415	39.8946	44.6674	30.6291	71.4547	63.7805	30.1383	48.9107	38.3382	28.7621	42.7178	28.8874	47.0447	63.3089	65.7277	50.1217	38.7123	42.3901	52.1942	42.6033	40.6799	24.4232	32.8262	28.2268	66.3346	48.0497	47.0301	36.9088	33.8414
	1900-01-02 02:12:00	OFF	42.7771	35.5621	41.4921	19.8355	16.0261	13.5923	24.429	24.2728	19.2458	25.36	26.2955	17.8194	27.7631	32.1716	55.3939	41.9689	31.9673	32.5889	28.1209	40.3473	44.1843	30.6058	68.2689	62.8347	28.2519	51.1468	36.9516	28.1463	43.7667	33.9353	53.9461	55.9298	65.4188	47.8504	36.7972	42.904	49.2373	41.1723	40.6066	27.0737	33.4261	30.6417	76.1102	52.2322	44.7011	36.6397	35.4686
	1900-01-02 02:28:00	OFF	38.4038	37.8529	39.3385	16.5572	11.8893	14.4913	23.6278	23.4234	19.4219	25.6623	27.2222	19.4578	23.7589	33.8504	55.1821	43.1032	30.3254	28.7597	29.6907	41.1161	42.7084	30.1057	62.8165	64.3377	28.2076	50.0508	39.0138	31.0379	42.0054	31.6213	57.7612	63.8592	61.211	47.6021	39.0937	40.9953	48.2464	42.363	40.3432	24.337	27.9459	33.1258	77.3785	50.9121	45.9348	39.957	34.2162
	1900-01-02 02:44:00	OFF	37.3048	38.6986	48.7922	22.0084	20.4287	16.0215	25.3078	24.3398	19.9572	27.7737	25.7934	19.2109	26.1271	32.7145	51.624	43.3649	40.0572	35.29	28.1191	42.2504	45.4781	33.1784	60.355	63.1467	31.145	51.4133	36.4028	24.6065	43.3926	31.106	55.3169	59.3031	63.1576	48.3654	39.3479	42.6388	49.3645	43.284	41.3909	24.7302	32.4234	34.1452	71.7678	48.0009	47.1467	40.1238	36.0161
	1900-01-02 03:00:00	OFF	39.7104	37.8006	47.0755	22.7992	20.5507	16.0289	26.746	27.57	19.5603	27.9793	28.4156	18.4683	27.676	35.2633	55.1651	43.2076	37.3544	34.2326	29.1599	43.2703	45.1478	31.4176	64.4017	64.0996	28.149	53.7743	38.7485	30.1346	47.0396	30.9806	52.9223	60.8681	66.5415	45.6965	42.8587	42.8711	51.1147	44.8368	43.9705	27.1368	33.5212	34.2649	80.5849	48.031	50.201	41.0611	36.8642
	1900-01-02 03:16:00	OFF	42.3823	39.8629	44.1537	21.9903	20.9204	15.5715	27.5853	31.2388	21.1361	26.8937	28.6178	22.1187	26.5662	37.5447	54.8652	44.4235	36.2493	31.1645	30.2547	48.4648	45.34	34.1538	67.9699	69.5669	28.9334	54.6261	38.8063	33.7674	46.5736	30.174	59.5088	65.1084	65.2189	50.2842	41.8711	42.8932	51.6747	48.0796	42.7372	28.0835	32.2819	33.1305	81.6936	52.6563	38.273	40.9764	38.3307
	1900-01-02 03:32:00	OFF	42.2974	42.3558	47.342	24.8629	18.3865	17.5575	27.1178	28.9178	24.5337	30.0494	27.9442	22.8229	28.4255	38.1109	50.5918	46.0229	35.3184	35.4051	31.411	42.5246	45.6061	34.9462	69.2242	69.826	30.7185	53.0927	39.5522	39.5712	49.7607	31.5724	64.2891	62.7921	63.099	47.6468	44.4685	38.0746	45.0871	46.9411	47.1308	27.8388	35.585	30.9802	85.1915	55.2542	50.6392	44.062	39.385
	1900-01-02 03:48:00	OFF	49.4773	42.5528	51.1148	26.1655	19.9971	17.7145	28.8289	32.3376	25.3923	35.311	29.5066	22.657	36.4154	33.198	51.3117	45.741	44.1652	36.6156	31.6361	46.2965	49.7257	32.4616	77.3103	62.0602	35.0998	52.906	37.7905	28.9147	48.1826	34.1421	61.1894	69.3932	70.7667	58.2381	43.2023	43.3322	53.1194	47.9267	48.4275	24.2643	34.4777	31.3348	79.7799	55.9182	49.4893	42.6083	38.6125
	1900-01-02 04:04:00	OFF	49.7106	44.7131	55.3396	24.1161	23.7363	19.929	28.3542	34.0702	26.418	34.5447	30.3512	23.9895	24.2369	39.1883	59.648	45.9356	35.9696	37.3535	32.5974	48.6486	46.8685	34.6246	66.0866	70.2947	33.2363	57.1834	38.9305	33.9244	48.0907	36.2428	66.4942	64.3739	72.5337	61.5173	46.2581	44.3327	49.3892	50.2662	47.2182	30.6848	34.1382	37.7206	90.1571	55.7138	50.6672	43.9593	42.1195
	1900-01-02 04:20:00	OFF	43.5343	49.0567	50.9102	15.549	21.1505	11.1426	31.3933	34.1382	26.1442	35.91	28.2954	23.7895	21.9955	41.2068	56.1874	48.293	41.7266	39.9144	33.9301	49.0818	45.5008	37.3607	70.1258	73.4406	31.7991	59.103	41.7505	40.9768	47.6214	33.5745	59.3994	78.2915	75.3777	56.5559	50.0708	44.7442	53.6869	50.3572	48.1591	30.8907	32.8335	36.8494	89.3683	44.1611	44.1952	48.3244	43.8102
	1900-01-02 04:36:00	OFF	40.9866	46.3199	56.2267	25.2681	24.8855	19.5084	30.6265	32.7985	28.705	36.4428	31.0247	27.0424	24.7837	39.9298	50.8017	46.8752	41.6387	39.0997	35.2593	51.4578	47.2068	38.1676	69.4772	72.8404	31.1515	55.3681	40.3815	37.5382	55.1291	37.0008	68.4023	84.0941	73.2402	58.2743	50.3008	45.6084	48.6596	53.071	48.7263	30.6656	37.7659	33.6093	91.3526	59.665	53.2495	47.8936	51.2322
	1900-01-02 04:52:00	OFF	44.8246	43.9302	56.6517	25.8945	30.983	21.0373	30.8515	29.2149	29.8881	38.9576	30.6367	29.0079	29.282	33.9472	60.33	48.0149	45.1378	39.4689	32.992	45.2808	49.667	39.003	70.5023	72.6506	26.6407	60.5405	41.1215	40.0025	54.3701	36.1506	69.5225	76.6764	72.0644	57.4433	53.6503	46.8902	53.0769	54.8338	51.9693	31.0614	37.4775	30.0892	95.6063	64.8843	56.5905	51.9153	50.4453
	1900-01-02 05:08:00	OFF	51.3091	46.1962	60.2039	25.172	28.3803	18.8433	33.402	32.399	27.95	39.9913	32.6508	29.916	31.2993	44.6341	60.5684	49.2069	44.8789	39.1701	34.4629	53.3319	49.0186	41.2177	75.1301	73.6348	38.6537	63.9697	43.6727	45.5414	57.1825	38.5508	75.4221	81.6037	73.9786	62.6747	55.0679	46.2031	52.9854	57.5505	55.4328	35.4569	37.4732	40.9058	100.789	62.9212	55.5344	50.9581	49.0619
	1900-01-02 05:24:00	OFF	48.135	55.9536	62.9889	24.6817	27.9406	16.8709	36.2291	36.3487	28.6395	42.5323	32.1648	28.8248	34.8258	47.052	60.2273	49.3098	50.9311	41.69	36.6354	55.9274	41.3346	42.3736	73.7265	77.4058	35.796	64.2468	44.6289	51.0803	60.9999	41.0332	82.3843	82.981	73.3991	59.4829	55.8676	46.3159	54.1553	57.79	56.7347	36.1177	34.9061	43.5299	104.711	64.8335	51.155	55.5	53.9764
	1900-01-02 05:40:00	OFF	44.1042	52.9044	62.9693	26.3228	29.928	23.398	34.0018	38.6315	26.9959	41.775	33.0706	29.2045	33.3299	45.5012	54.1084	50.73	51.7902	43.2659	34.6998	54.0977	52.9731	40.9022	69.533	78.7582	36.7954	65.1964	44.4304	47.2053	56.6421	37.5794	80.8114	92.6254	68.3131	62.8203	58.6505	47.6665	61.3746	59.8395	58.2303	35.8043	39.7415	43.5686	103.579	59.8951	57.4402	55.7044	57.7765
	1900-01-02 05:56:00	OFF	46.5418	54.4283	64.575	28.4127	34.5336	23.0219	37.464	39.9278	30.9932	47.499	33.324	29.7531	33.0677	46.5924	63.7265	50.9644	54.6448	43.0888	36.7848	59.2421	58.6819	42.1665	74.5803	79.2048	34.4919	73.6425	44.7473	48.0528	57.5691	38.3538	81.5096	102.397	71.879	61.6511	60.1975	47.1514	55.8678	61.6781	63.3822	31.0271	40.6521	47.4206	107.624	71.167	59.1038	57.2494	59.4074
[truncated: 10 more columns]

## Sheet: Fig 2B
	Line	WUE
	WT Col-0	3.09119
	WT Col-0	2.87326
	WT Col-0	2.77728
	WT Col-0	3.00694
	WT Col-0	2.64497
	WT Col-0	3.03563
	WT Col-0	3.06607
	WT Col-0	2.81681
	WT Col-0	3.1118
	WT Col-0	2.88274
	WT Col-0	2.8764
	WT Col-0	3.05916
	WT Col-0	3.17715
	WT Col-0	2.80675
	Col-S2	2.00469
	Col-S2	2.05545
	Col-S2	2.11892
	Col-S2	2.00972
	Col-S2	1.89784
	Col-S2	2.13635
	Col-S2	2.26745
	Col-S2	2.09503
	Col-S2	2.29584
	Col-S2	2.16566
	Col-S2	1.93246
	Col-S2	2.07478
	Col-S2	1.98793
	Col-S2	2.01673
	Col-S2	1.97281
	Col-S2	2.20735
	mpk12-3	2.01461
	mpk12-3	2.05781
	mpk12-3	2.25496
	mpk12-3	2.26611
	mpk12-3	2.1225
	mpk12-3	2.12532
	mpk12-3	1.92956
	mpk12-3	2.09388
	mpk12-3	2.0462
	mpk12-3	2.03169
	mpk12-3	2.06432
	mpk12-3	1.95528
	mpk12-3	2.20157
	mpk12-3	2.06751
	mpk12-4	2.12517
	mpk12-4	2.08025
	mpk12-4	2.03487
	mpk12-4	2.21687
	mpk12-4	1.88446
	mpk12-4	2.16877
	mpk12-4	2.06215
	mpk12-4	2.15326
	mpk12-4	2.03117
	mpk12-4	2.21981
	mpk12-4	2.12875
	mpk12-4	2.04035
	mpk12-4	2.07529

## Sheet: Fig 2C
	Line	Stomatal conductance (mmol m-2 s-1)
	WT Col-0	178.793
	WT Col-0	249.721
	WT Col-0	155.61
	WT Col-0	121.456
	WT Col-0	108.287
	WT Col-0	186.213
	WT Col-0	140.518
	WT Col-0	167.669
	WT Col-0	187.437
	WT Cvi-0	382.626
	WT Cvi-0	200.889
	WT Cvi-0	353.57
	WT Cvi-0	344.538
	WT Cvi-0	330.27
	WT Cvi-0	577.503
	WT Cvi-0	548.303
	WT Cvi-0	367.141
	WT Cvi-0	357.898
	MPK12-Col-0 in Cvi-0 #1	65.9275
	MPK12-Col-0 in Cvi-0 #1	190.77
	MPK12-Col-0 in Cvi-0 #1	125.006
	MPK12-Col-0 in Cvi-0 #1	116.45
	MPK12-Col-0 in Cvi-0 #1	137.866
	MPK12-Col-0 in Cvi-0 #1	209.768
	MPK12-Col-0 in Cvi-0 #1	91.4412
	MPK12-Col-0 in Cvi-0 #1	128.661
	MPK12-Col-0 in Cvi-0 #1	226.979
	MPK12-Col-0 in Cvi-0 #2	122.331
	MPK12-Col-0 in Cvi-0 #2	74.7119
	MPK12-Col-0 in Cvi-0 #2	119.113
	MPK12-Col-0 in Cvi-0 #2	97.4439
	MPK12-Col-0 in Cvi-0 #2	133.046
	MPK12-Col-0 in Cvi-0 #2	224.71
	MPK12-Col-0 in Cvi-0 #2	189.822
	MPK12-Col-0 in Cvi-0 #2	183.88
	MPK12-Col-0 in Cvi-0 #2	139.153

## Sheet: Fig 2D
	Line	Stomatal conductance (mmol m-2 s-1)
	WT Col-0	207.556
	WT Col-0	192.831
	WT Col-0	167.869
	WT Col-0	127.532
	WT Col-0	119.367
	WT Col-0	193.056
	WT Col-0	77.2504
	WT Col-0	117.04
	Col-S2	291.33
	Col-S2	275.375
	Col-S2	331.442
	Col-S2	349.304
	Col-S2	320.604
	MPK12-Col-0 in Col-S2 #6	249.907
	MPK12-Col-0 in Col-S2 #6	133.308
	MPK12-Col-0 in Col-S2 #6	155.43
	MPK12-Col-0 in Col-S2 #6	159.378
	MPK12-Col-0 in Col-S2 #6	233.386
	MPK12-Col-0 in Col-S2 #6	173.447
	MPK12-Col-0 in Col-S2 #6	239.323

## Sheet: Fig 2E
	Line	Stomatal conductance (mmol m-2 s-1)
	WT Col-0	152.223
	WT Col-0	110.208
	WT Col-0	90.0653
	WT Col-0	92.05
	WT Col-0	92.1868
	WT Col-0	92.1868
	mpk12-4	248.906
	mpk12-4	260.966
	mpk12-4	245.959
	mpk12-4	179.345
	mpk12-4	244.785
	MPK12-Col-0 in mpk12-4 #18	92.9528
	MPK12-Col-0 in mpk12-4 #18	126.094
	MPK12-Col-0 in mpk12-4 #18	126.32
	MPK12-Col-0 in mpk12-4 #18	121.045
	MPK12-Col-0 in mpk12-4 #18	88.4641
	MPK12-Col-0 in mpk12-4 #19	89.2802
	MPK12-Col-0 in mpk12-4 #19	113.434
	MPK12-Col-0 in mpk12-4 #19	87.9589
	MPK12-Col-0 in mpk12-4 #19	127.044
	MPK12-Col-0 in mpk12-4 #19	100.701
	MPK12-Col-0 in mpk12-4 #19	75.6463
	MPK12-Cvi-0 in mpk12-4 #1	297.349
	MPK12-Cvi-0 in mpk12-4 #1	220.373
	MPK12-Cvi-0 in mpk12-4 #1	309.352
	MPK12-Cvi-0 in mpk12-4 #1	231.082
	MPK12-Cvi-0 in mpk12-4 #1	331.002
	MPK12-Cvi-0 in mpk12-4 #1	290.939
	MPK12-Cvi-0 in mpk12-4 #15	201.269
	MPK12-Cvi-0 in mpk12-4 #15	305.95
	MPK12-Cvi-0 in mpk12-4 #15	284.792
	MPK12-Cvi-0 in mpk12-4 #15	284.477
	MPK12-Cvi-0 in mpk12-4 #15	239.501
	MPK12-Cvi-0 in mpk12-4 #15	322.682

## Sheet: Fig 3A
	Line	Stomatal opening rate (mmol m-1 s-1 h-1)
	WT Col-0	120.643
	WT Col-0	124.659
	WT Col-0	106.924
	WT Col-0	149.552
	WT Col-0	159.39
	WT Col-0	100.073
	WT Col-0	180.521
	WT Col-0	132.987
	WT Col-0	131.807
	WT Col-0	245.036
	WT Col-0	152.106
	WT Col-0	160.289
	WT Col-0	132.408
	Col-S2	67.0747
	Col-S2	11.7254
	Col-S2	47.0672
	Col-S2	-16.9783
	Col-S2	101.632
	Col-S2	165.839
	Col-S2	45.3175
	Col-S2	80.2395
	Col-S2	56.855
	Col-S2	77.3775
	Col-S2	19.3073
	Col-S2	45.5498
	mpk12-3	60.0623
	mpk12-3	17.118
	mpk12-3	77.3002
	mpk12-3	32.4054
	mpk12-3	47.2584
	mpk12-3	56.7106
	mpk12-3	64.8927
	mpk12-3	106.987
	mpk12-3	87.1633
	mpk12-3	28.9112
	mpk12-3	37.7941
	mpk12-3	41.1644
	mpk12-4	67.9847
	mpk12-4	86.7996
	mpk12-4	52.1072
	mpk12-4	84.1282
	mpk12-4	25.6497
	mpk12-4	72.8
	mpk12-4	54.5779
	mpk12-4	62.2959
	mpk12-4	72.5266
	mpk12-4	28.3286
	mpk12-4	39.7233
	mpk12-4	28.3642
	ibr5-1	167.855
	ibr5-1	152.261
	ibr5-1	140.526
	ibr5-1	99.0147
	ibr5-1	149.141
	ibr5-1	119.651
	ibr5-1	135.325
	ibr5-1	186.908
	ibr5-1	294.154
	ibr5-1	152.414
	ibr5-1	109.857
	ibr5-1	220.015

## Sheet: Fig 3B
	Treatment	Line	Stomatal opening rate (mmol m-1 s-1 h-1)
	-ABA+light	WT Col-0	84.4761
	-ABA+light	WT Col-0	82.2511
	-ABA+light	WT Col-0	251.184
	-ABA+light	WT Col-0	111.462
	-ABA+light	WT Col-0	83.7571
	-ABA+light	WT Col-0	132.175
	-ABA+light	WT Col-0	35.0033
	-ABA+light	WT Col-0	124.17
	-ABA+light	WT Col-0	85.2606
	-ABA+light	WT Col-0	105.848
	-ABA+light	WT Col-0	157.352
	-ABA+light	WT Col-0	103.862
	-ABA+light	WT Col-0	116.69
	-ABA+light	WT Col-0	188.133
	-ABA+light	WT Col-0	115.495
	+ABA+light	WT Col-0	103.924
	+ABA+light	WT Col-0	77.1508
	+ABA+light	WT Col-0	21.283
	+ABA+light	WT Col-0	35.1581
	+ABA+light	WT Col-0	8.12585
	+ABA+light	WT Col-0	29.1197
	+ABA+light	WT Col-0	-26.8712
	+ABA+light	WT Col-0	25.6559
	+ABA+light	WT Col-0	37.5341
	+ABA+light	WT Col-0	-2.31541
	+ABA+light	WT Col-0	52.4168
	+ABA+light	WT Col-0	-0.510564
	+ABA+light	WT Col-0	45.243
	+ABA+light	WT Col-0	58.5847
	+ABA+light	WT Col-0	-92.7197
	+ABA+light	WT Col-0	-5.49979
	-ABA+light	Col-S2	124.906
	-ABA+light	Col-S2	227.521
	-ABA+light	Col-S2	231.105
	-ABA+light	Col-S2	164.557
	-ABA+light	Col-S2	126.941
	-ABA+light	Col-S2	89.5149
	-ABA+light	Col-S2	376.77
	-ABA+light	Col-S2	78.0318
	-ABA+light	Col-S2	12.9515
	-ABA+light	Col-S2	89.5033
	-ABA+light	Col-S2	192.003
	-ABA+light	Col-S2	145.739
	-ABA+light	Col-S2	262.702
	-ABA+light	Col-S2	-14.2308
	-ABA+light	Col-S2	83.3128
	-ABA+light	Col-S2	127.109
	-ABA+light	Col-S2	144.414
	-ABA+light	Col-S2	90.5626
	+ABA+light	Col-S2	153.67
	+ABA+light	Col-S2	107.328
	+ABA+light	Col-S2	67.9441
	+ABA+light	Col-S2	97.8377
	+ABA+light	Col-S2	114.869
	+ABA+light	Col-S2	298.657
	+ABA+light	Col-S2	63.4681
	+ABA+light	Col-S2	-81.5789
	+ABA+light	Col-S2	155.052
	+ABA+light	Col-S2	92.7488
	+ABA+light	Col-S2	215.124
	+ABA+light	Col-S2	103.29
	+ABA+light	Col-S2	126.912
	+ABA+light	Col-S2	132.03
	+ABA+light	Col-S2	72.744
	+ABA+light	Col-S2	74.9125
	+ABA+light	Col-S2	88.674
	+ABA+light	Col-S2	-10.0014
	-ABA+light	mpk12-3	66.3384
	-ABA+light	mpk12-3	165.724
	-ABA+light	mpk12-3	230.435
	-ABA+light	mpk12-3	140.948
	-ABA+light	mpk12-3	187.008
	-ABA+light	mpk12-3	106.811
	-ABA+light	mpk12-3	91.9963
	-ABA+light	mpk12-3	269.061
	-ABA+light	mpk12-3	267.924
	-ABA+light	mpk12-3	177.566
	-ABA+light	mpk12-3	185.384
	-ABA+light	mpk12-3	56.8601
	-ABA+light	mpk12-3	90.4697
	-ABA+light	mpk12-3	215.588
	-ABA+light	mpk12-3	68.6745
	+ABA+light	mpk12-3	15.0934
	+ABA+light	mpk12-3	151.211
	+ABA+light	mpk12-3	192.922
	+ABA+light	mpk12-3	102.099
	+ABA+light	mpk12-3	35.6138
	+ABA+light	mpk12-3	99.3129
	+ABA+light	mpk12-3	221.232
	+ABA+light	mpk12-3	-49.9354
	+ABA+light	mpk12-3	111.586
	+ABA+light	mpk12-3	-16.2865
	+ABA+light	mpk12-3	137.253
	+ABA+light	mpk12-3	-51.0418
	+ABA+light	mpk12-3	32.6587
	+ABA+light	mpk12-3	213.135
	+ABA+light	mpk12-3	127.751
	+ABA+light	mpk12-3	22.077
	-ABA+light	mpk12-4	174.449
	-ABA+light	mpk12-4	263.362
	-ABA+light	mpk12-4	177.446
	-ABA+light	mpk12-4	132.762
	-ABA+light	mpk12-4	200.852
	-ABA+light	mpk12-4	192.159
	-ABA+light	mpk12-4	83.95
	-ABA+light	mpk12-4	82.7261
	-ABA+light	mpk12-4	192.331
	-ABA+light	mpk12-4	181.482
	-ABA+light	mpk12-4	198.054
	-ABA+light	mpk12-4	86.9149
	-ABA+light	mpk12-4	261.733
	-ABA+light	mpk12-4	301.824
	-ABA+light	mpk12-4	36.056
	-ABA+light	mpk12-4	139.899
	+ABA+light	mpk12-4	196.865
	+ABA+light	mpk12-4	95.1979
	+ABA+light	mpk12-4	183.06
	+ABA+light	mpk12-4	25.7214
	+ABA+light	mpk12-4	206.221
	+ABA+light	mpk12-4	14.6595
	+ABA+light	mpk12-4	37.7172
	+ABA+light	mpk12-4	145.065
	+ABA+light	mpk12-4	-30.3774
	+ABA+light	mpk12-4	-97.6318
	+ABA+light	mpk12-4	256.538
	+ABA+light	mpk12-4	85.8607
	+ABA+light	mpk12-4	-15.7714
	+ABA+light	mpk12-4	160.868
	+ABA+light	mpk12-4	178.776
	+ABA+light	mpk12-4	104.808
	-ABA+light	ibr5-1	100.404
	-ABA+light	ibr5-1	101.397
	-ABA+light	ibr5-1	159.261
	-ABA+light	ibr5-1	48.0077
	-ABA+light	ibr5-1	53.5681
	-ABA+light	ibr5-1	156.276
	-ABA+light	ibr5-1	112.173
	-ABA+light	ibr5-1	128.825
	-ABA+light	ibr5-1	84.3266
	-ABA+light	ibr5-1	22.2145
	-ABA+light	ibr5-1	10.4055
	-ABA+light	ibr5-1	110.274
	-ABA+light	ibr5-1	137.942
	-ABA+light	ibr5-1	-6.90919
	-ABA+light	ibr5-1	165.394
	-ABA+light	ibr5-1	69.037
	+ABA+light	ibr5-1	73.95
	+ABA+light	ibr5-1	44.9009
	+ABA+light	ibr5-1	64.6108
	+ABA+light	ibr5-1	20.8543
	+ABA+light	ibr5-1	46.0721
	+ABA+light	ibr5-1	22.5983
	+ABA+light	ibr5-1	75.9723
	+ABA+light	ibr5-1	-16.4092
	+ABA+light	ibr5-1	46.7701
	+ABA+light	ibr5-1	43.5191
	+ABA+light	ibr5-1	47.103
	+ABA+light	ibr5-1	68.4405
	+ABA+light	ibr5-1	48.3529
	+ABA+light	ibr5-1	-17.0357
	+ABA+light	ibr5-1	-4.24682
	+ABA+light	ibr5-1	-61.9372

[truncated: 28 more sheets: Fig 3C, Fig 3D, Fig 3E, Fig 4B, Fig 4D, Fig 4F, Fig 5B, S1A Fig, S1C Fig, S1E Fig, S1F Fig, S1G Fig, S2B Fig, S2C Fig, S2G Fig, S2H Fig, S4A Fig, S4B Fig, S4C Fig, S5A Fig …]
